# Supplementary material
Source: PubMed Central journal article supplement (PMC4975626)
Supplement: NIHMS791745-supplement-3.pdf [file NIHMS791745-supplement-3.pdf]

Supplementary Table 1, *Kozyreva*

| Patient Information |              |                   |           |           |             |            | Xenograft Information |           |             |                  |
|---------------------|--------------|-------------------|-----------|-----------|-------------|------------|-----------------------|-----------|-------------|------------------|
| PDX-ID              | Source       | Primary Diagnosis | ER status | PR status | HER2 status | Metastases | ER status             | PR status | HER2 status | Metastases       |
| HCI-001             | Breast tumor | IDC               | neg       | neg       | neg         | Lung       | neg                   | neg       | neg         | Lung             |
| HCI-002             | Breast tumor | IDC               | neg       | neg       | neg         | Lymph node | neg                   | neg       | neg         | Lung, Lymph node |
| PEN25               | Breast tumor | IDC               | neg       | neg       | equivocal   | unknown    | neg                   | neg       | neg         | lung             |
| PEN27               | Breast tumor | IDC               | pos       | pos       | neg         | unknown    | pos                   | pos       | neg         | Lung, lymph node |
| PEN65               | Breast tumor | IDC               | pos       | pos       | neg         | Lymph node | pos                   | pos       | neg         | Lymph node       |
